# Supplementary material for: Physician Compensation Arrangements and Financial Performance Incentives in US Health Systems
Source: PubMed Central journal article supplement (PMC8903115; doi:10.1001/jamahealthforum.2021.4634), 2022-01-28
Supplement: jamahealthforum-e214634-s001.pdf [file jamahealthforum-e214634-s001.pdf]

## Supplemental Online Content

Reid RO, Tom AK, Ross RM, Duffy EL, Damberg CL. Physician compensation arrangements and financial performance incentives in US health systems. *JAMA Health Forum*. 2022;3(1):e214634. doi:10.1001/jamahealthforum.2021.4634

### **eMethods.**

This supplemental material has been provided by the authors to give readers additional information about their work.

**eMethods.**

**SELECTED QUESTIONS FROM THE HEALTH SYSTEM PHYSICIAN ORGANIZATION LEADER SURVEY INSTRUMENT**

1. Does your physician organization measure, report, and/or provide financial incentives to **primary care physicians** on their individual performance for any of the following performance areas?

- “**Measure**” means your organization *tracks* physician performance in this area.
- “**Report**” means your organization provides *scorecards or other types of performance reports* to physicians.
- “**Financial incentive**” means your organization includes the performance area in its *variable compensation* for physicians

| <b>Performance Area<br/>(Primary Care Physicians)</b>                                          | <b>Measure</b>           | <b>Report</b>            | <b>Provide<br/>Financial<br/>Incentive</b> | <b>Do Not Measure,<br/>Report, or<br/>Financially<br/>Incentivize</b> |
|------------------------------------------------------------------------------------------------|--------------------------|--------------------------|--------------------------------------------|-----------------------------------------------------------------------|
| <b>Productivity</b> (e.g., patient visits, charges, encounter data submissions, or RVUs (FFS)) | <input type="checkbox"/> | <input type="checkbox"/> | <input type="checkbox"/>                   | <input type="checkbox"/>                                              |
| <b>Panel size</b> (e.g., number of patients in a panel)                                        | <input type="checkbox"/> | <input type="checkbox"/> | <input type="checkbox"/>                   | <input type="checkbox"/>                                              |
| <b>Clinical quality of care</b> (e.g., HEDIS, Medicare Star measures)                          | <input type="checkbox"/> | <input type="checkbox"/> | <input type="checkbox"/>                   | <input type="checkbox"/>                                              |
| <b>Patient experience or satisfaction</b> (e.g., CAHPS)                                        | <input type="checkbox"/> | <input type="checkbox"/> | <input type="checkbox"/>                   | <input type="checkbox"/>                                              |
| <b>Efficient utilization of resources</b> (e.g., reducing inpatient days)                      | <input type="checkbox"/> | <input type="checkbox"/> | <input type="checkbox"/>                   | <input type="checkbox"/>                                              |
| <b>Access</b> (e.g., accepting new patients, extended hours)                                   | <input type="checkbox"/> | <input type="checkbox"/> | <input type="checkbox"/>                   | <input type="checkbox"/>                                              |
| <b>Total cost of care</b> (e.g., shared savings payments)                                      | <input type="checkbox"/> | <input type="checkbox"/> | <input type="checkbox"/>                   | <input type="checkbox"/>                                              |
| <b>HCC/RAF coding*</b>                                                                         | <input type="checkbox"/> | <input type="checkbox"/> | <input type="checkbox"/>                   | <input type="checkbox"/>                                              |
| <b>Other</b> (if yes, please specify):<br>_____                                                | <input type="checkbox"/> | <input type="checkbox"/> | <input type="checkbox"/>                   | <input type="checkbox"/>                                              |

\*HCC=Hierarchical Condition Category. RAF=Risk Adjustment Factor. Used to adjust Medicare payments

2. Does your physician organization measure, report, and/or provide financial incentives to some or all **specialty care physicians** on their individual performance for any of the following performance areas?

- “**Measure**” means your organization *tracks* physician performance in this area.
- “**Report**” means your organization provides *scorecards or other types of performance reports* to physicians.
- “**Financial incentive**” means your organization includes the performance area in *variable compensation* for physicians.

| <b>Performance Area<br/>(Specialty Care Physicians)</b>                                        | <b>Measure</b>           | <b>Report</b>            | <b>Provide<br/>Financial<br/>Incentive</b> | <b>Do Not Measure,<br/>Report, or<br/>Financially<br/>Incentivize</b> |
|------------------------------------------------------------------------------------------------|--------------------------|--------------------------|--------------------------------------------|-----------------------------------------------------------------------|
| <b>Productivity</b> (e.g., patient visits, charges, encounter data submissions, or RVUs (FFS)) | <input type="checkbox"/> | <input type="checkbox"/> | <input type="checkbox"/>                   | <input type="checkbox"/>                                              |
| <b>Panel size</b> (e.g., number of patients in a panel)                                        | <input type="checkbox"/> | <input type="checkbox"/> | <input type="checkbox"/>                   | <input type="checkbox"/>                                              |
| <b>Clinical quality of care</b> (e.g., HEDIS, Medicare Star measures)                          | <input type="checkbox"/> | <input type="checkbox"/> | <input type="checkbox"/>                   | <input type="checkbox"/>                                              |
| <b>Patient experience or satisfaction</b> (e.g., CAHPS)                                        | <input type="checkbox"/> | <input type="checkbox"/> | <input type="checkbox"/>                   | <input type="checkbox"/>                                              |
| <b>Efficient utilization of resources</b> (e.g., reducing inpatient days)                      | <input type="checkbox"/> | <input type="checkbox"/> | <input type="checkbox"/>                   | <input type="checkbox"/>                                              |
| <b>Access</b> (e.g., accepting new patients, extended hours)                                   | <input type="checkbox"/> | <input type="checkbox"/> | <input type="checkbox"/>                   | <input type="checkbox"/>                                              |
| <b>Total cost of care</b> (e.g., shared savings payments)                                      | <input type="checkbox"/> | <input type="checkbox"/> | <input type="checkbox"/>                   | <input type="checkbox"/>                                              |
| <b>HCC/RAF coding</b>                                                                          | <input type="checkbox"/> | <input type="checkbox"/> | <input type="checkbox"/>                   | <input type="checkbox"/>                                              |
| <b>Other</b> (if yes, please specify):<br>_____                                                | <input type="checkbox"/> | <input type="checkbox"/> | <input type="checkbox"/>                   | <input type="checkbox"/>                                              |

\*HCC=Hierarchical Condition Category. RAF=Risk Adjustment Factor. Used to adjust Medicare payments

3. For a typical **primary care physician** in your organization, what are the three top easiest actions he/she could do to increase his/her compensation? *List them in order, with Action 1 being the easiest.*

| Action—Primary Care Physicians |
|--------------------------------|
| Action #1                      |
| Action #2                      |
| Action #3                      |

4. For a typical **specialty care physician** in your organization, what are the three top easiest actions he/she could do to increase his/her compensation? *List them in order, with Action 1 being the easiest.*

| Action—Specialty Physicians |
|-----------------------------|
| Action #1                   |
| Action #2                   |
| Action #3                   |

## SELECTED QUESTIONS FROM HEALTH SYSTEM PHYSICIAN ORGANIZATION LEADER SEMI-STRUCTURED INTERVIEW GUIDE

1. **How are your primary care physicians paid?** (*meaning: Is their compensation primarily based on salary, capitation, or something else?*)
  
2. **For a typical primary care physician in your organization, how much of their compensation falls into the following categories?** (*probe: do family medicine physicians and internal medicine physicians have same compensation approach?*)

|                                                                                                                                |   |
|--------------------------------------------------------------------------------------------------------------------------------|---|
| Base salary                                                                                                                    | % |
| Capitation                                                                                                                     | % |
| Fee-for-service (e.g., RVUs, productivity)                                                                                     | % |
| Performance-based incentives (e.g., bonuses or penalties based on quality, patient experience, utilization of resources, etc.) | % |
| Profit sharing                                                                                                                 | % |
| Other (if yes, please specify): _____                                                                                          | % |
| <b>TOTAL (should add to 100%)</b>                                                                                              |   |

3. **How are your specialty care physicians paid?** (*meaning Is their compensation primarily based on salary, capitation, or something else?*)
  
4. **For a typical specialty care physician in your organization, how much of their compensation falls into the following categories?**

|                                                                                                                                |   |
|--------------------------------------------------------------------------------------------------------------------------------|---|
| Base salary                                                                                                                    | % |
| Capitation                                                                                                                     | % |
| Fee-for-service (e.g., RVUs, productivity)                                                                                     | % |
| Performance-based incentives (e.g., bonuses or penalties based on quality, patient experience, utilization of resources, etc.) | % |
| Profit sharing                                                                                                                 | % |
| Other (if yes, please specify): _____                                                                                          | % |
| <b>TOTAL (should add to 100%)</b>                                                                                              |   |

5. **What share of your physician organization's total revenues do you estimate come from the following sources?** (*interviewer: should add to 100%*)

Fee-for-service \_\_\_\_\_

Capitation \_\_\_\_\_

Other sources \_\_\_\_\_
